# Supplementary material for: High heterogeneity undermines generalization of differential expression results in RNA-Seq analysis
Source: PubMed Central journal article supplement (PMC7845028; doi:10.1186/s40246-021-00308-5), 2021-01-28
Supplement: 40246_2021_308_MOESM3_ESM.pdf [file 40246_2021_308_MOESM3_ESM.pdf]

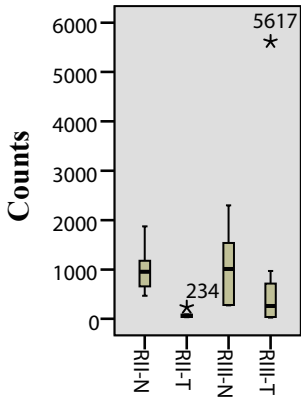

*CKMT2*

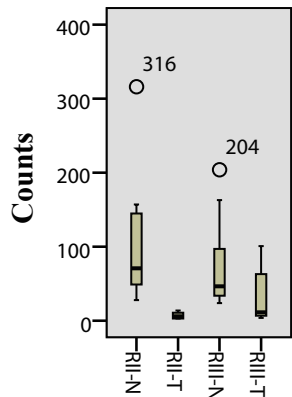

*NAT2*

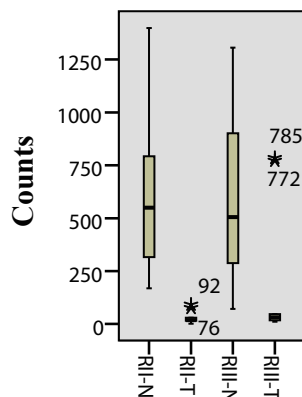

*DIRAS1*

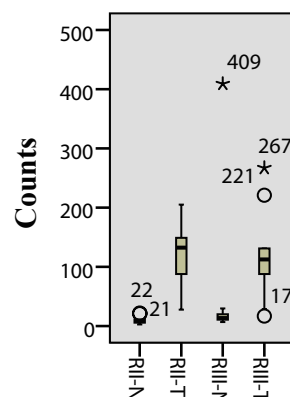

*MCM10*

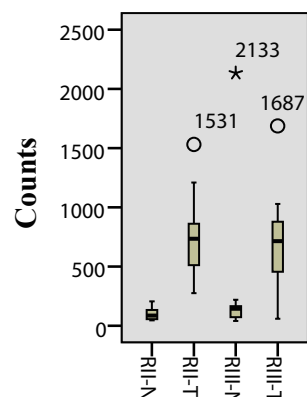

*TPX2*

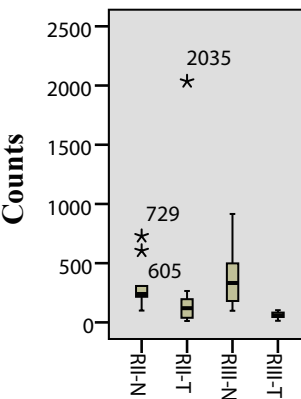

*ANKRD22*

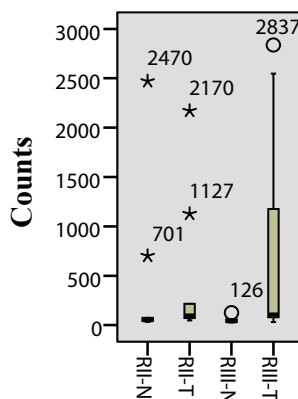

*RPL10P9*

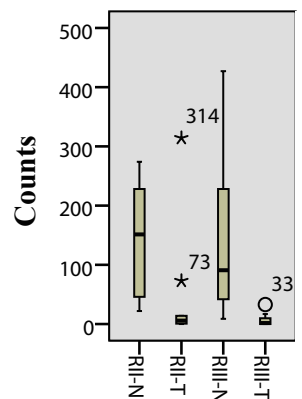

*WT1\_AS*

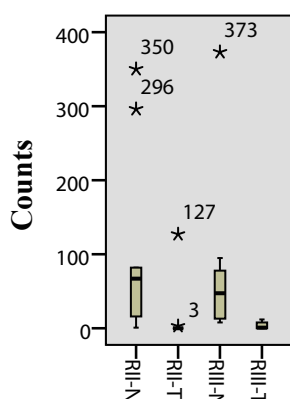

*MTDHP3*

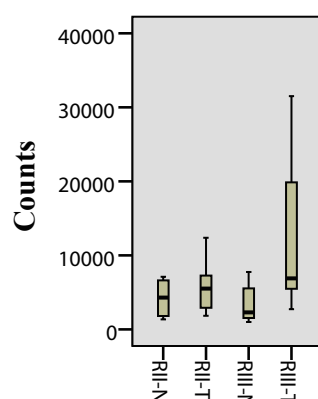

*NUPR1*
