# Supplementary material for: High heterogeneity undermines generalization of differential expression results in RNA-Seq analysis
Source: PubMed Central journal article supplement (PMC7845028; doi:10.1186/s40246-021-00308-5), 2021-01-28

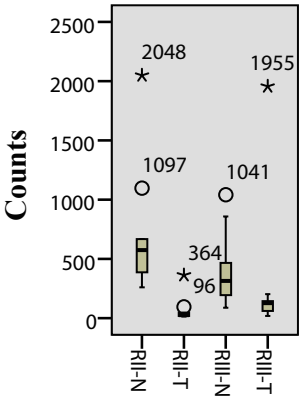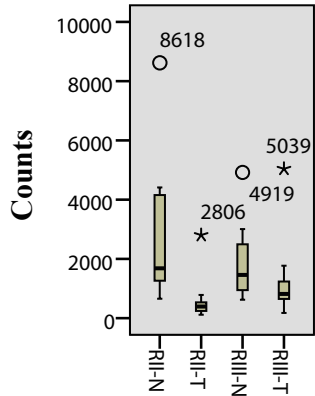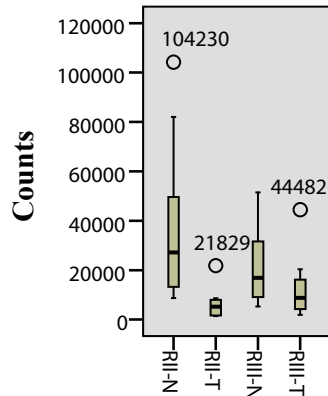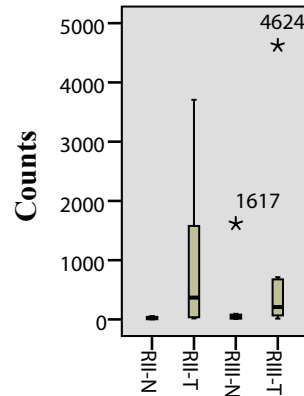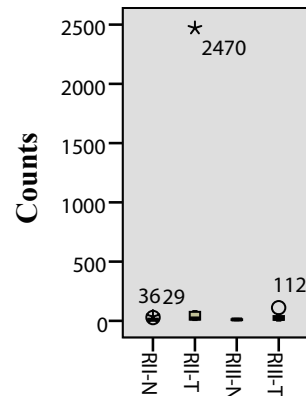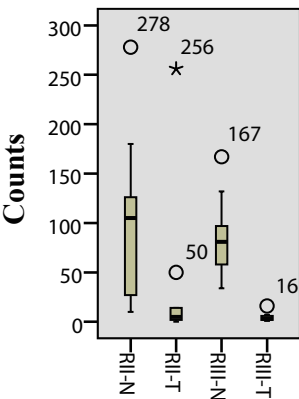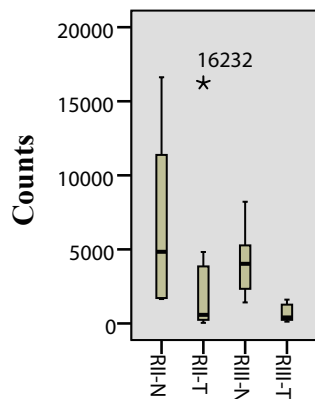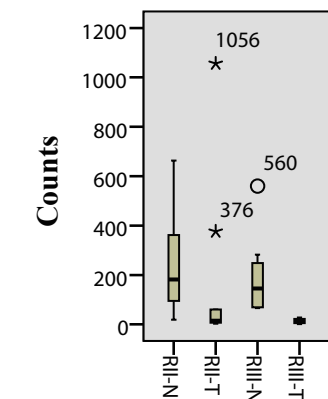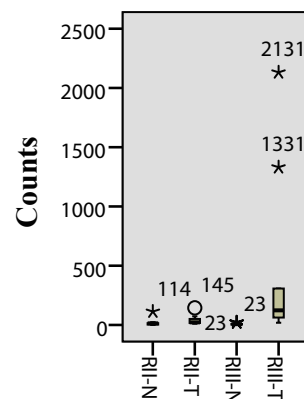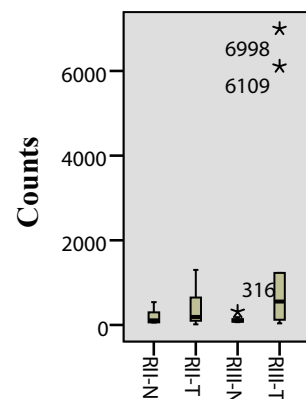

Supplement: 40246_2021_308_MOESM4_ESM.pdf [file 40246_2021_308_MOESM4_ESM.pdf]
