# Supplementary material for: High heterogeneity undermines generalization of differential expression results in RNA-Seq analysis
Source: PubMed Central journal article supplement (PMC7845028; doi:10.1186/s40246-021-00308-5), 2021-01-28
Supplement: 40246_2021_308_MOESM5_ESM.pdf [file 40246_2021_308_MOESM5_ESM.pdf]

**BRCA dataset**  
Total: 1177 samples

**Tumor tissue**  
1018 samples

**Normal tissue**  
99 samples

Sampling without replacement

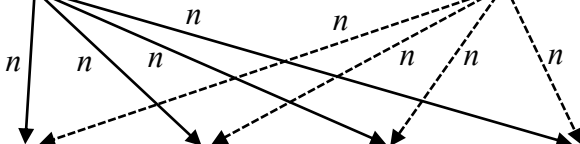

Biological  
replicate  
number

**Repeat I**

**Repeat II**

**Repeat III**

**Repeat IV**

$n = 3$

DEG list I

DEG list II

DEG list III

DEG list IV

$n = 4$

DEG list I

DEG list II

DEG list III

DEG list IV

...

...

...

...

...

$n$  (Max) = 24

DEG list I

DEG list II

DEG list III

DEG list IV

Power analysis for different  $n$   
( $n$  (Max) was used as a reference)

Overlap rate analysis between any  
two, three, or four repeats for each  $n$
